# Supplementary material for: Removal of toxic dyes from aqueous medium using adenine based bicomponent hydrogel
Source: Royal Society of Chemistry journal article supplement (doi:10.1039/c2ra22988a), 2012-11-28
Supplement: c2ra22988a.pdf [file c2ra22988a.pdf]

## Electronic Supplementary Materials

### **Removal of Toxic Dyes from Aqueous Medium Using Adenine Based Bicomponent Hydrogel**

Pradip K. Sukul, and Sudip Malik

Polymer Science Unit, Indian Association for the Cultivation of Science, 2A & 2B  
Raja S. C. Mullick Road, Jadavpur, Kolkata – 700032, India.

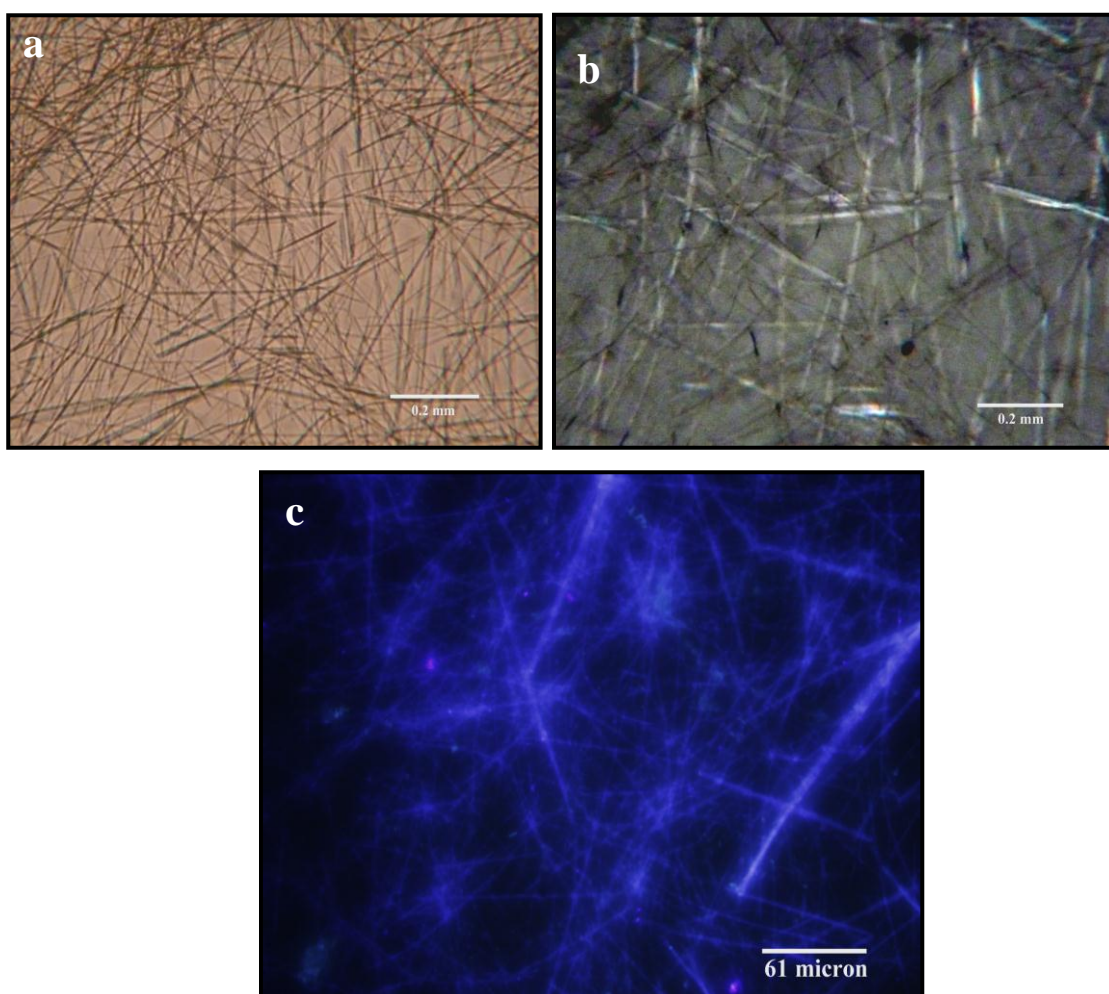

**Fig. S1.** (a) Optical image, (b) optical image under polarized light and (c) fluorescence image of dried gel under excitation at 380 nm [ADN:tpca=1:1, (0.57 % w/v), a slice of gel was cast on a glass slide and dried under air prior to taking image].

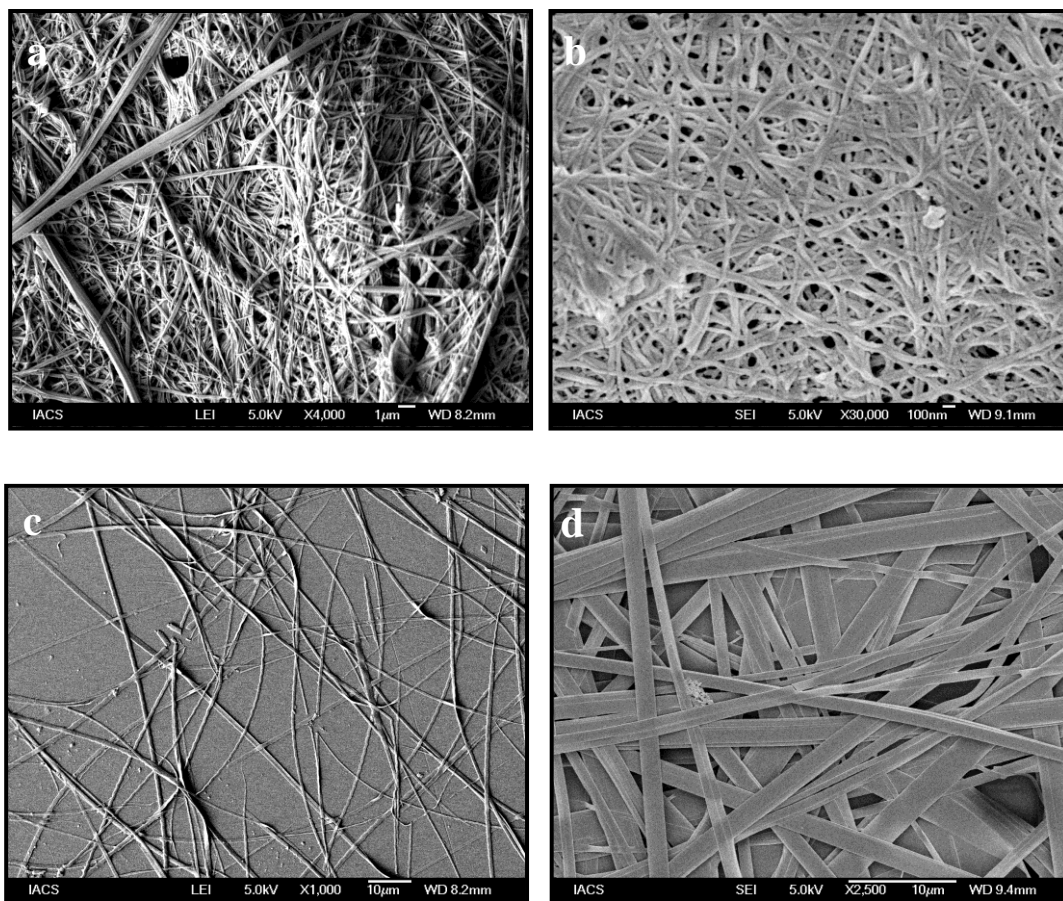

**Fig. S2.** FE-SEM images of (a) ADN/tpca1:3, (b) ADN/tpca 3:1 dried gel, and (c) ADN/bpca1:3, (d) ADN/bpca 3:1 dried gel.
